# Supplementary material
Source: PubMed Central journal article supplement (PMC7428867)

Supplementary figure S1

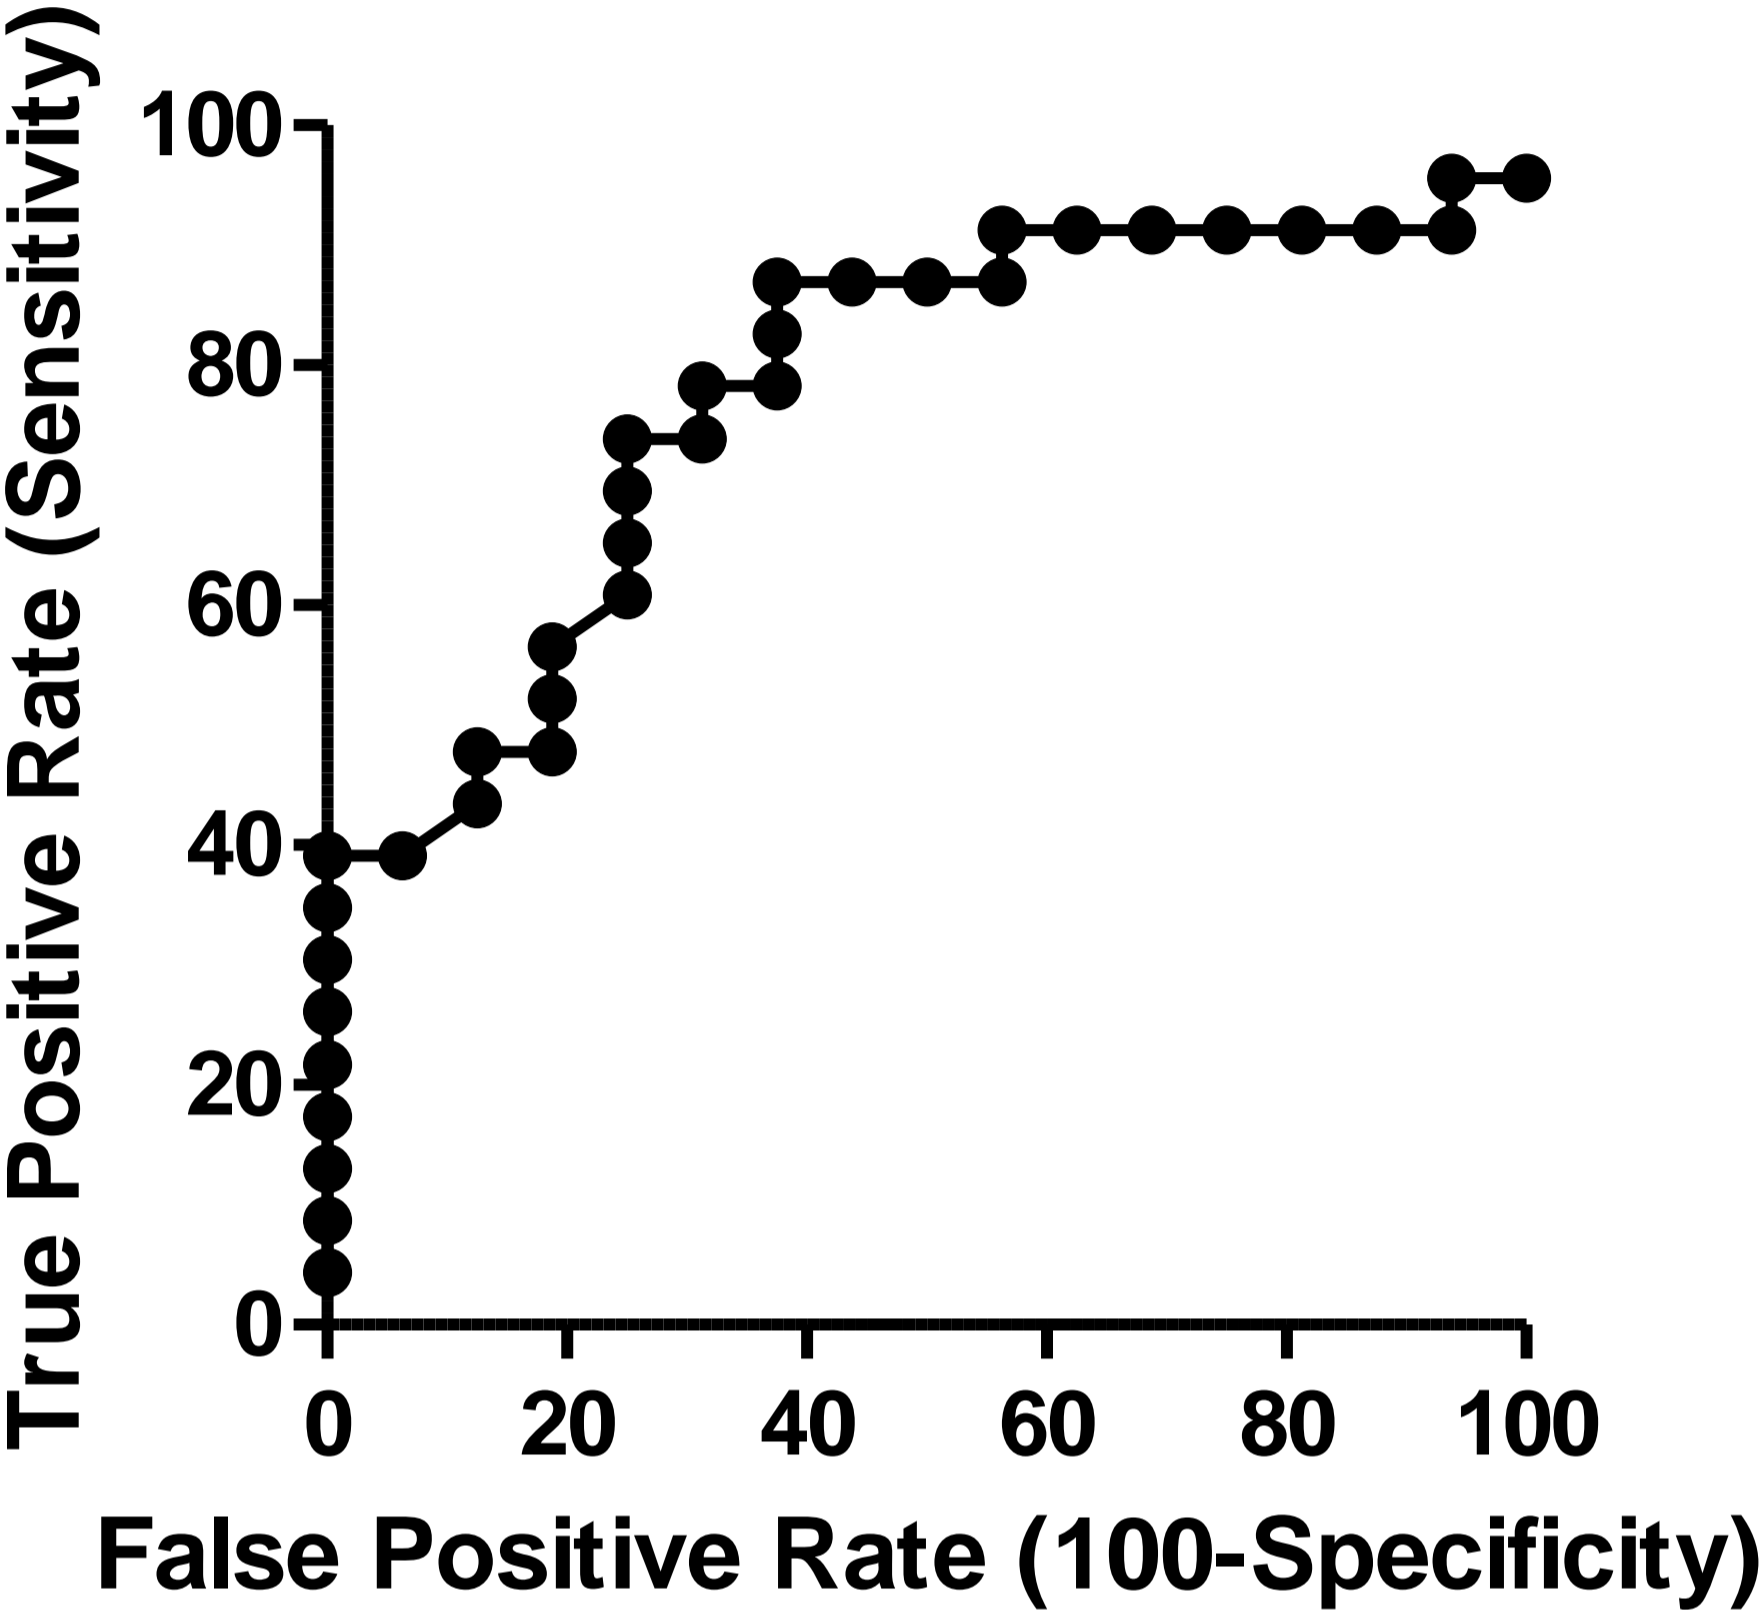

Supplementary figure S2

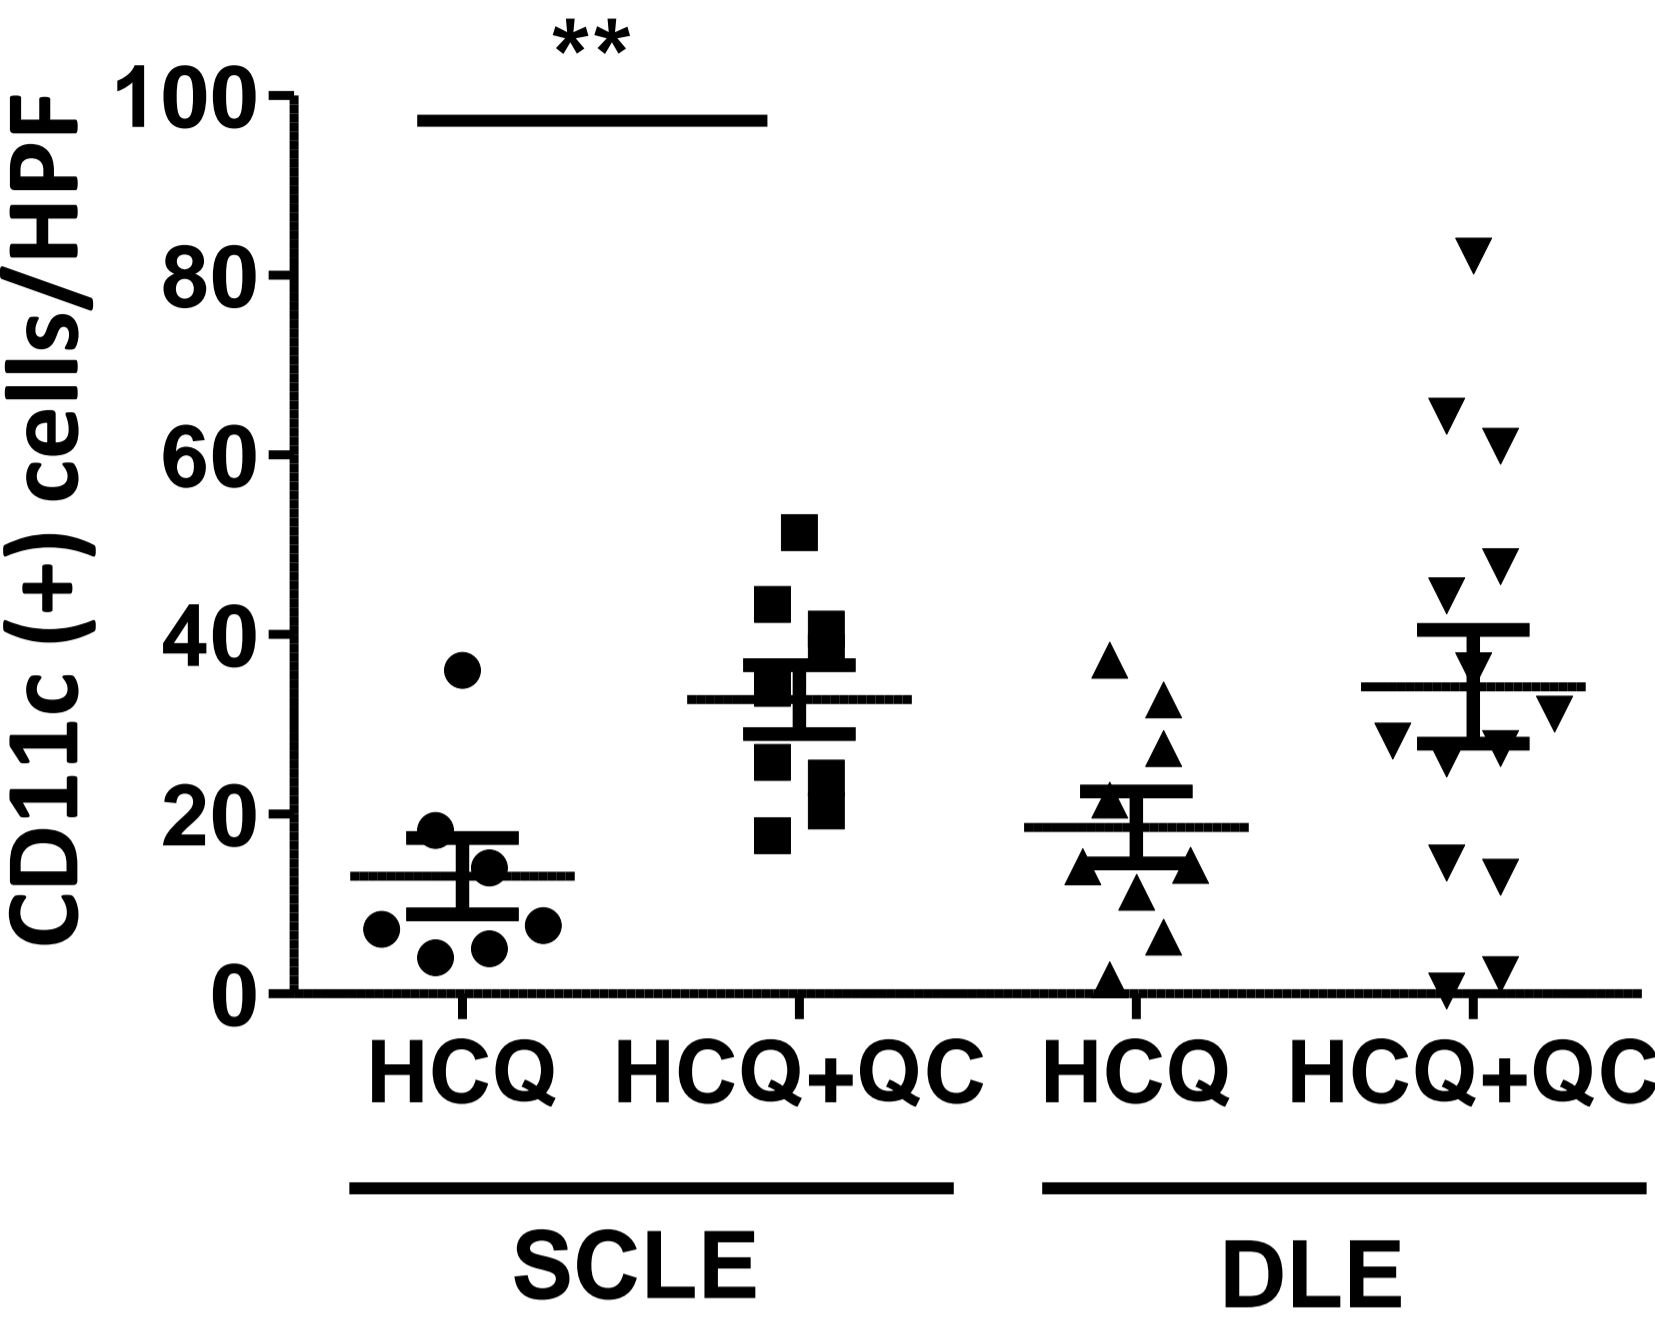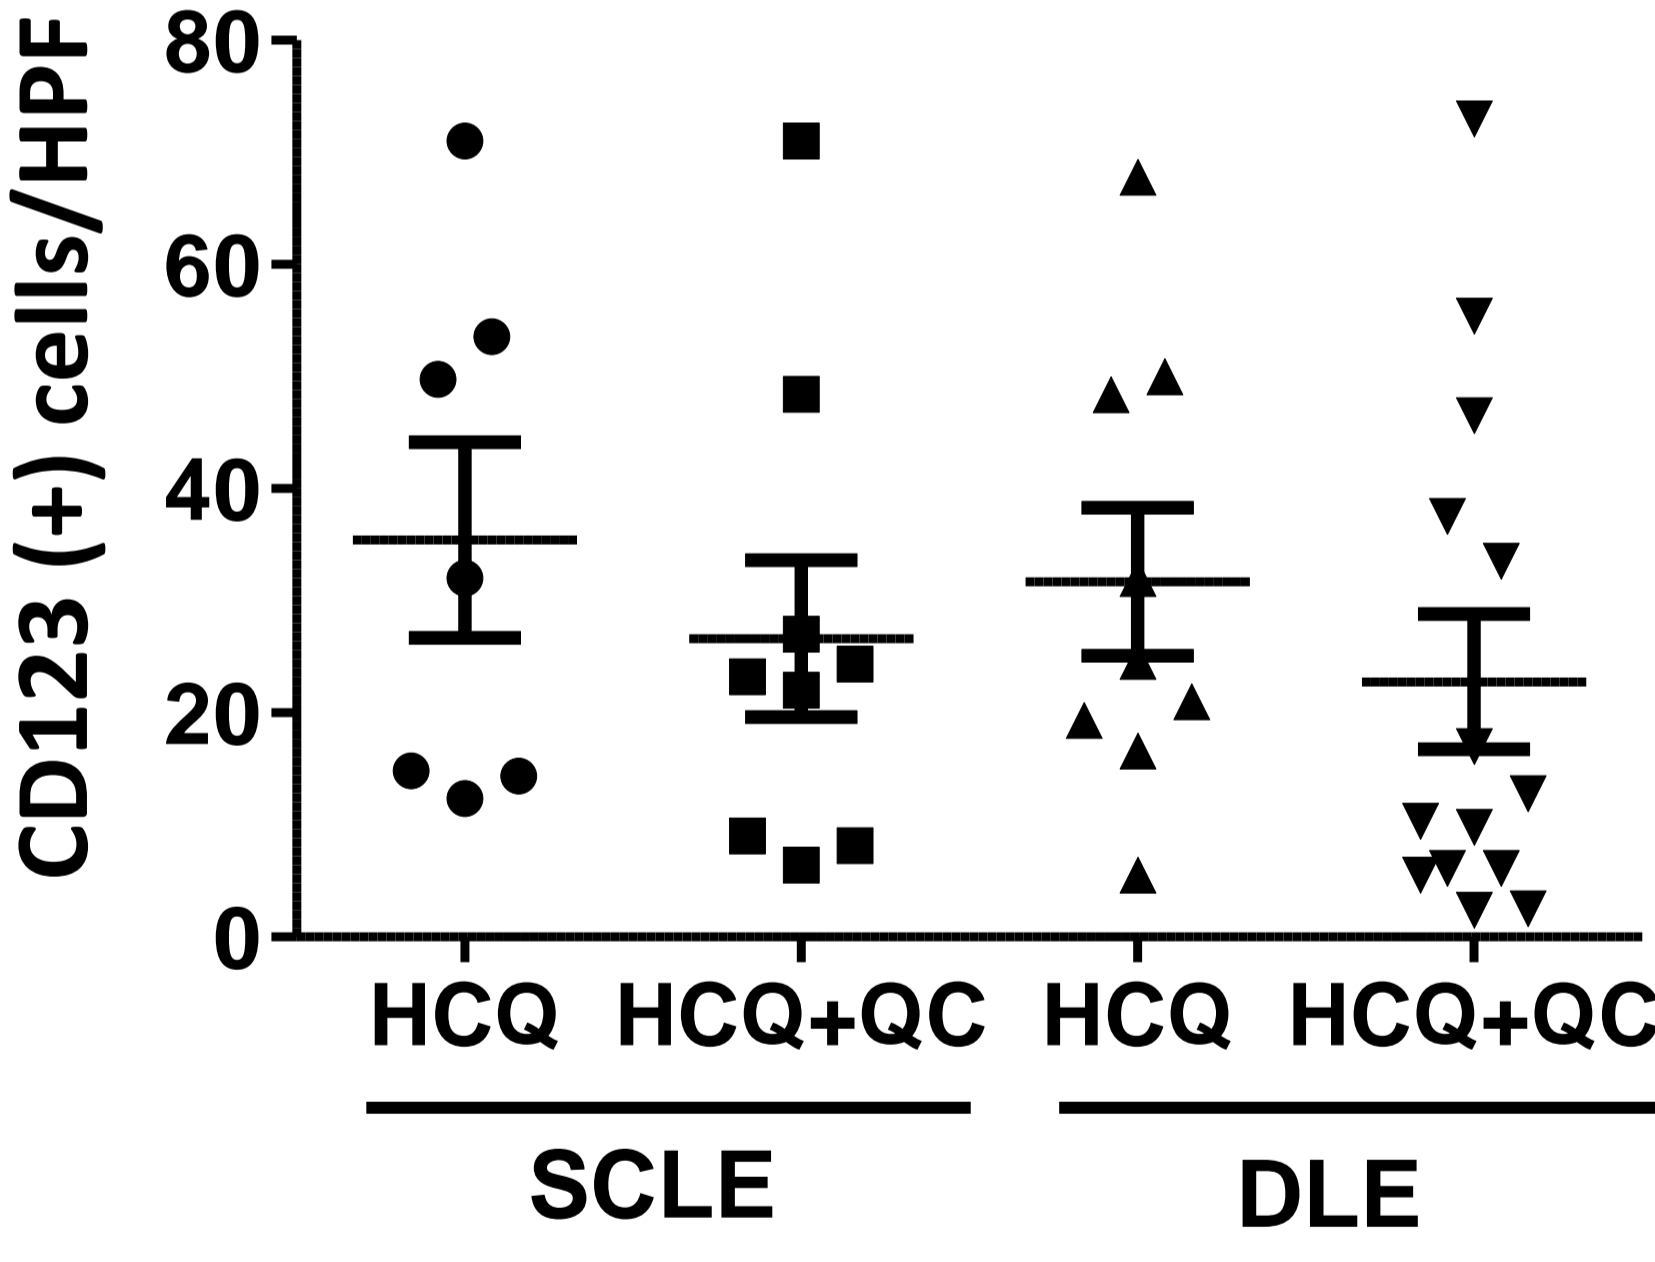

Supplement: NIHMS1615122-supplement-supplementary_figures_s1_and_S2.pdf [file NIHMS1615122-supplement-supplementary_figures_s1_and_S2.pdf]
